# Supplementary material for: Genome-Wide Association Study Uncovers Novel Genomic Regions Associated With Coleoptile Length in Hard Winter Wheat
Source: PubMed Central journal article supplement (PMC7025573; doi:10.3389/fgene.2019.01345), 2020-02-05

**Supplementary Figure S1.** Population structure analysis of 298 genotypes of Hard winter wheat association-mapping panel (HWWAMP). The genotype of each line is represented by a colour bar, with four different colours elucidating population structure for K1-K4.

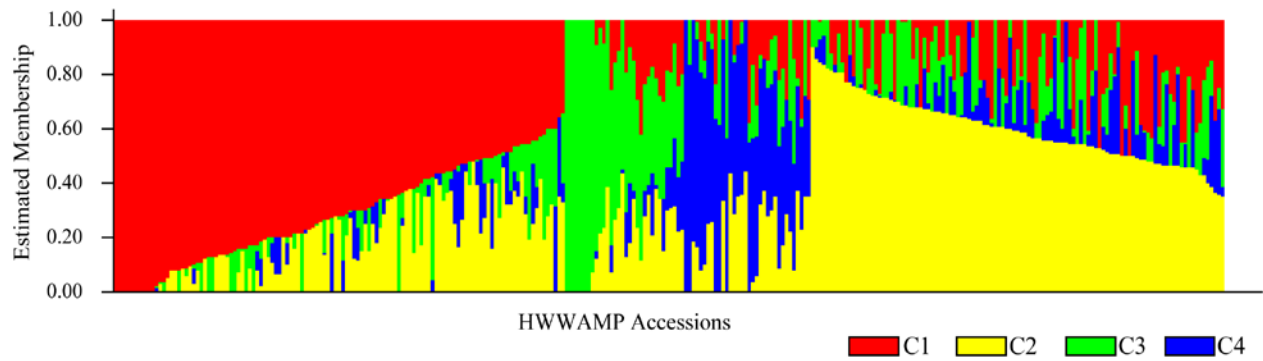

Supplement: Image_1.pdf [file Image_1.pdf]
